# Supplementary material for: Bayesian Source Attribution of Salmonella Typhimurium Isolates From Human Patients and Farm Animals in England and Wales
Source: Front Microbiol. 2021 Jan 28;12:579888. doi: 10.3389/fmicb.2021.579888 (PMC7876086; doi:10.3389/fmicb.2021.579888)
Supplement: Supplementary file 2 [file Data_Sheet_1.xlsx]

## Sheet: CorrCoeffsSNP10
		Food source factors									Virulence						Source attribution
		Broilers	Layers	Turkey	Game birds	Cattle	Pigs	Sheep	Other Mammals	Strain 2	Strain 3	Strain 4	Strain 5	Strain 6	Strain 7	Strain 8	Broilers	Layers	Turkey	Game birds	Cattle	Pigs	Sheep	Other mammals
Food source factors	Broilers	1	-0.025217	-0.042597	-0.021022	-0.0060294	-0.049322	0.032812	0.026211	-0.0032415	-0.001448	-0.052844	0.014504	0.026194	0.030338	-0.0010618	0.78647	-0.020747	-0.027361	-0.013616	0.013178	-0.042878	0.052384	0.066723
	Layers	-0.025217	1	0.0041237	-0.048632	0.036502	-0.032886	-0.032146	-0.029577	0.00629	-0.040888	-0.0077135	-0.010283	0.024436	0.0044576	0.0059107	-0.0074741	0.79118	7.3725e-05	-0.044466	-0.0077822	-0.019675	-0.045344	-0.016048
	Turkey	-0.042597	0.0041237	1	-0.011967	0.033956	0.0078403	-0.048204	-0.004925	-0.0092148	-0.040222	-0.10059	-0.077674	-0.036002	-0.064705	-0.052128	-0.087467	-0.049344	0.71186	-0.067154	-0.084955	-0.43963	-0.067776	-0.12856
	Game birds	-0.021022	-0.048632	-0.011967	1	-0.014865	-0.020777	-0.028512	-0.038138	0.0076914	0.023149	-0.0043414	-0.029392	-0.020302	-0.038191	-0.017368	0.012244	-0.049714	0.011881	0.83106	-0.0010506	-0.03603	-0.021927	-0.013918
	Cattle	-0.0060294	0.036502	0.033956	-0.014865	1	-0.00072163	-0.0060755	-0.020424	-0.086783	0.0085467	-0.073633	-0.055394	-0.08829	-0.051388	-0.050776	-0.033421	-0.017045	-0.062059	-0.059899	0.69154	-0.40573	-0.051493	-0.094958
	Pigs	-0.049322	-0.032886	0.0078403	-0.020777	-0.00072163	1	0.026269	0.033246	-0.052263	-0.10546	-0.058769	-0.16535	-0.13426	-0.15852	-0.13174	-0.13844	-0.10676	-0.1608	-0.094012	-0.093855	0.24837	-0.046124	-0.15282
	Sheep	0.032812	-0.032146	-0.048204	-0.028512	-0.0060755	0.026269	1	-0.0022994	0.0034072	-0.013434	-0.068417	-0.027711	-0.046595	-0.079311	0.031325	0.046746	-0.064272	-0.026592	-0.012077	-0.00024527	0.0015916	0.82886	0.040599
	Other mammals	0.026211	-0.029577	-0.004925	-0.038138	-0.020424	0.033246	-0.0022994	1	-0.0093994	-0.010912	-0.022503	0.039338	0.0075109	-0.052577	-0.047538	0.0076439	-0.032984	-0.052952	-0.037952	-0.0035227	-0.13258	0.0059937	0.61651
Virulence factors	Strain 2	-0.0032415	0.00629	-0.0092148	0.0076914	-0.086783	-0.052263	0.0034072	-0.0093994	1	0.0064552	0.017167	-0.049966	-0.024176	0.010729	-0.0058703	0.008572	0.02112	0.018542	0.060258	-0.046474	-0.0059126	0.024835	0.070625
	Strain 3	-0.001448	-0.040888	-0.040222	0.023149	0.0085467	-0.10546	-0.013434	-0.010912	0.0064552	1	0.018874	0.017733	0.040113	-0.010882	-0.011643	0.048717	-0.0020836	-0.0080508	0.04451	0.072481	-0.073257	0.016799	0.084292
	Strain 4	-0.052844	-0.0077135	-0.10059	-0.0043414	-0.073633	-0.058769	-0.068417	-0.022503	0.017167	0.018874	1	0.029945	-0.022721	0.010582	0.045369	0.025218	0.047008	-0.028538	0.038132	-0.0082943	0.0042934	-0.013727	0.065439
	Strain 5	0.014504	-0.010283	-0.077674	-0.029392	-0.055394	-0.16535	-0.027711	0.039338	-0.049966	0.017733	0.029945	1	0.021153	0.076981	0.050015	0.063923	0.061244	0.016543	0.011034	0.04544	-0.081148	0.02849	0.10516
	Strain 6	0.026194	0.024436	-0.036002	-0.020302	-0.08829	-0.13426	-0.046595	0.0075109	-0.024176	0.040113	-0.022721	0.021153	1	0.032283	0.035793	0.067715	0.08067	0.049216	0.024421	-9.131e-06	-0.065126	0.0049008	0.06911
	Strain 7	0.030338	0.0044576	-0.064705	-0.038191	-0.051388	-0.15852	-0.079311	-0.052577	0.010729	-0.010882	0.010582	0.076981	0.032283	1	-0.0019785	0.042194	0.046625	-0.004922	0.0069842	-0.015588	0.0065086	-0.04222	0.015531
	Strain 8	-0.0010618	0.0059107	-0.052128	-0.017368	-0.050776	-0.13174	0.031325	-0.047538	-0.0058703	-0.011643	0.045369	0.050015	0.035793	-0.0019785	1	0.035804	0.053047	-0.0022792	0.00027611	-0.02143	0.0049744	0.078827	0.024969
Source attribution	Broilers	0.78647	-0.0074741	-0.087467	0.012244	-0.033421	-0.13844	0.046746	0.0076439	0.008572	0.048717	0.025218	0.063923	0.067715	0.042194	0.035804	1	0.018394	-0.039917	0.039827	0.035309	-0.075195	0.11187	0.10912
	Layers	-0.020747	0.79118	-0.049344	-0.049714	-0.017045	-0.10676	-0.064272	-0.032984	0.02112	-0.0020836	0.047008	0.061244	0.08067	0.046625	0.053047	0.018394	1	-0.00086914	-0.011908	-0.010527	-0.054374	-0.028847	0.074617
	Turkey	-0.027361	7.3725e-05	0.71186	0.011881	-0.062059	-0.1608	-0.026592	-0.052952	0.018542	-0.0080508	-0.028538	0.016543	0.049216	-0.004922	-0.0022792	-0.039917	-0.00086914	1	-0.010041	-0.12383	-0.65499	-0.023022	-0.077346
	Game birds	-0.013616	-0.044466	-0.067154	0.83106	-0.059899	-0.094012	-0.012077	-0.037952	0.060258	0.04451	0.038132	0.011034	0.024421	0.0069842	0.00027611	0.039827	-0.011908	-0.010041	1	0.0072732	-0.056287	0.019962	0.059446
	Cattle	0.013178	-0.0077822	-0.084955	-0.0010506	0.69154	-0.093855	-0.00024527	-0.0035227	-0.046474	0.072481	-0.0082943	0.04544	-9.131e-06	-0.015588	-0.02143	0.035309	-0.010527	-0.12383	0.0072732	1	-0.60332	0.0045135	-0.020515
	Pigs	-0.042878	-0.019675	-0.43963	-0.03603	-0.40573	0.24837	0.0015916	-0.13258	-0.0059126	-0.073257	0.0042934	-0.081148	-0.065126	0.0065086	0.0049744	-0.075195	-0.054374	-0.65499	-0.056287	-0.60332	1	-0.032674	-0.22676
	Sheep	0.052384	-0.045344	-0.067776	-0.021927	-0.051493	-0.046124	0.82886	0.0059937	0.024835	0.016799	-0.013727	0.02849	0.0049008	-0.04222	0.078827	0.11187	-0.028847	-0.023022	0.019962	0.0045135	-0.032674	1	0.11233
	Other mammals	0.066723	-0.016048	-0.12856	-0.013918	-0.094958	-0.15282	0.040599	0.61651	0.070625	0.084292	0.065439	0.10516	0.06911	0.015531	0.024969	0.10912	0.074617	-0.077346	0.059446	-0.020515	-0.22676	0.11233	1
